# Supplementary material for: Numb provides a fail-safe mechanism for intestinal stem cell self-renewal in adult Drosophila midgut
Source: PubMed Central journal article supplement (PMC11580950; doi:10.1101/2024.11.06.622285), 2024-11-07
Supplement: NIHPP2024.11.06.622285v1-supplement-1.pdf [file NIHPP2024.11.06.622285v1-supplement-1.pdf]

599 **Figure 5-figure supplement1. Numb is required for EE fate determination**

600 (A-C') ISC MARCM clone (green) of control (A, A'), *numb*<sup>4</sup> (B, B'), and *numb*<sup>15</sup> (C, C') are  
601 stained for Pros (red) at 14 days after clone induction. Representative clone in control  
602 guts (A, A') contains EE cells (Pros positive), as indicated with yellow arrows.  
603 Representative clones in *numb*<sup>4</sup> (B, B') and *numb*<sup>15</sup> (C, C') guts do not contain any EE  
604 cells. Scale bar (20 μm) is presented in (A).

605
